# Supplementary material
Source: Springer Nature journal article supplement (https://www.springermedizin.de/resource/supplementary/12872_2014_741_MOESM7_ESM.pdf/9430780)

**A**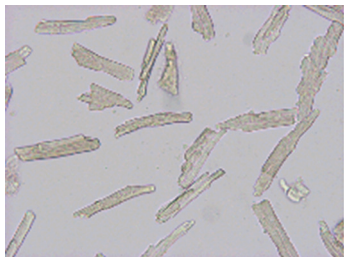*ae3*<sup>+/+</sup>**B**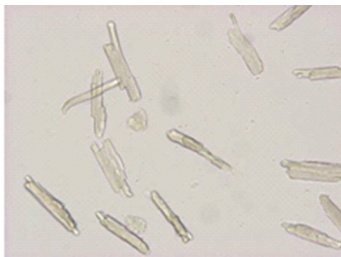*ae3*<sup>-/-</sup>**C**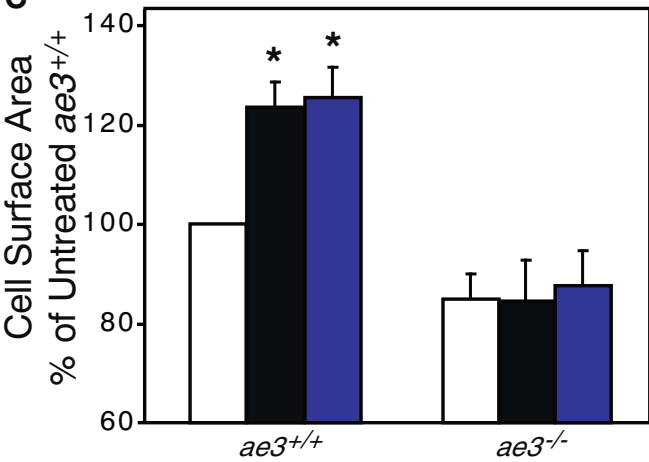

Supplement: MOESM7 [file 9430780]
